# Supplementary material for: Percolation threshold of graphene nanosheets as conductive additives in Li4Ti5O12 anodes of Li-ion batteries
Source: Royal Society of Chemistry journal article supplement (doi:10.1039/c2nr33099g), 2013-01-01
Supplement: c2nr33099g.pdf [file c2nr33099g.pdf]

## Electronic Supplementary Information (ESI)

# Percolation threshold of graphene nanosheets as conductive additive in $\text{Li}_4\text{Ti}_5\text{O}_{12}$ anodes of Li-ion batteries

Biao Zhang, Yang Yu, Yusi Liu, Zhen-Dong Huang, Yan-bing He and Jang-Kyo Kim\*

Department of Mechanical Engineering, Hong Kong University of Science and Technology, Clear Water Bay, Hong Kong, China. Email: [mejkkim@ust.hk](mailto:mejkkim@ust.hk)

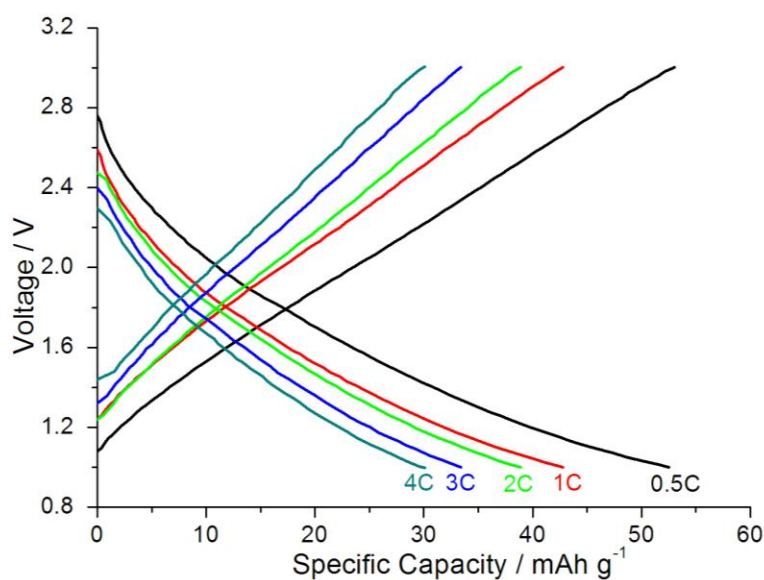

Fig. S1 Charge/discharge curves of graphene nanosheets obtained at different current rates. ( $1\text{C} = 175 \text{ mA g}^{-1}$ )

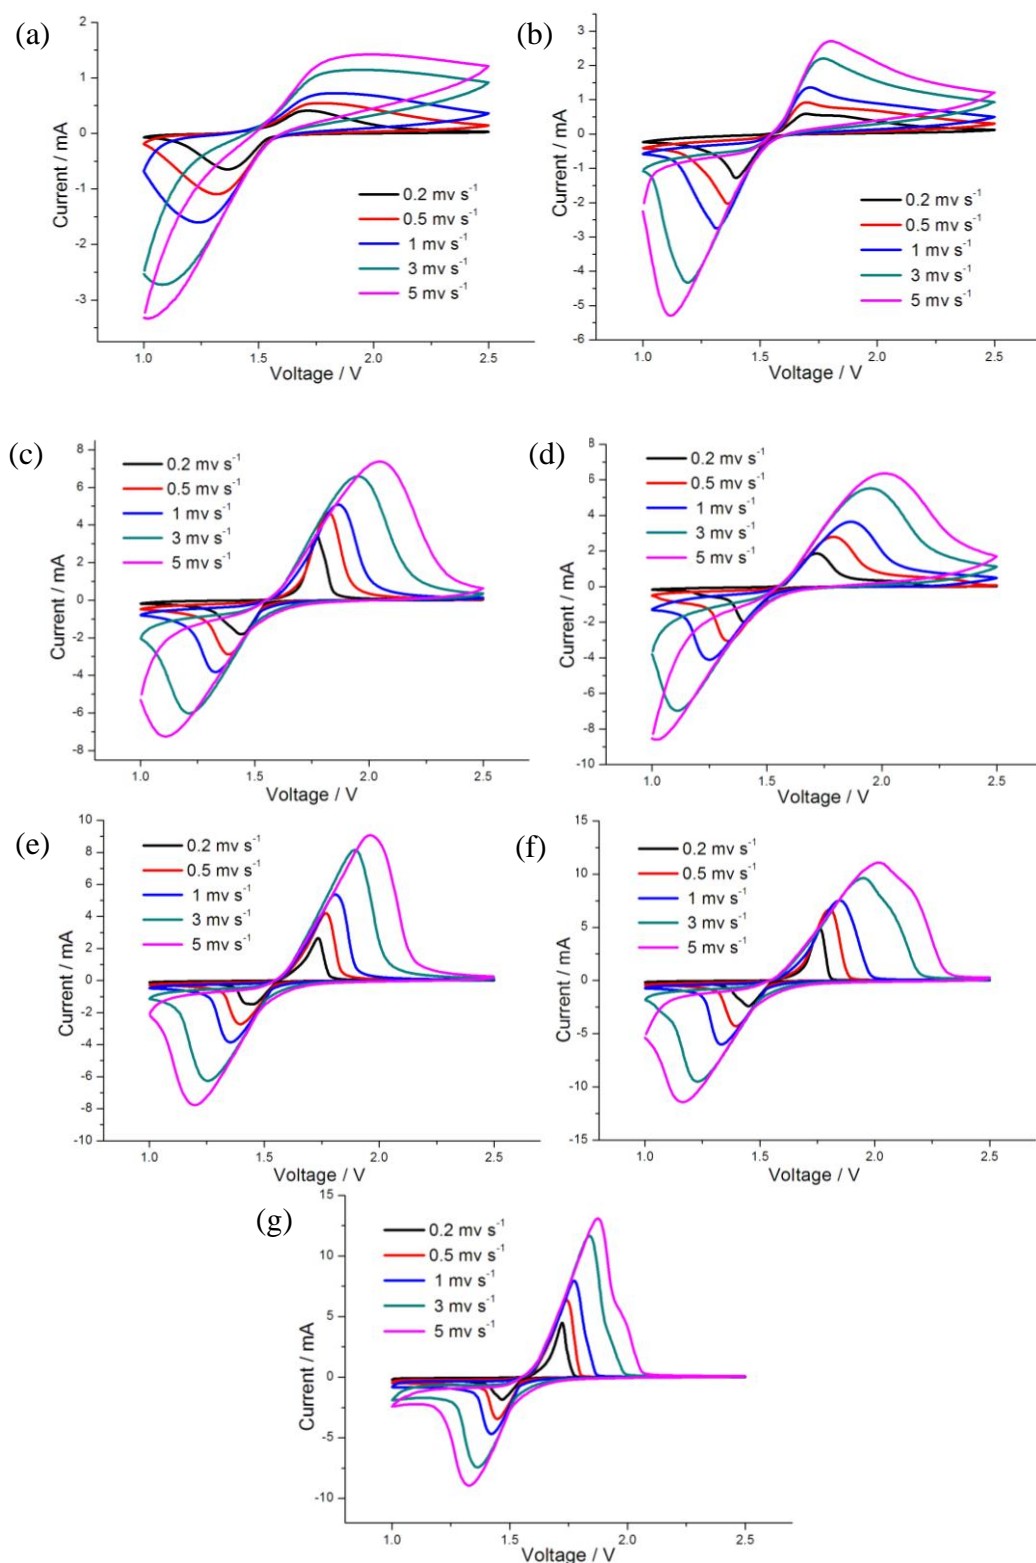

Fig. S2 CV curves at different scan rates of electrodes containing GNSs: (a) 0 wt.%; (b) 1 wt.%; (c) 2 wt.%; (d) 3.5 wt.%; (e) 5 wt.%; and (f) 10 wt.%; and (g) electrode containing 15 wt.% CB.

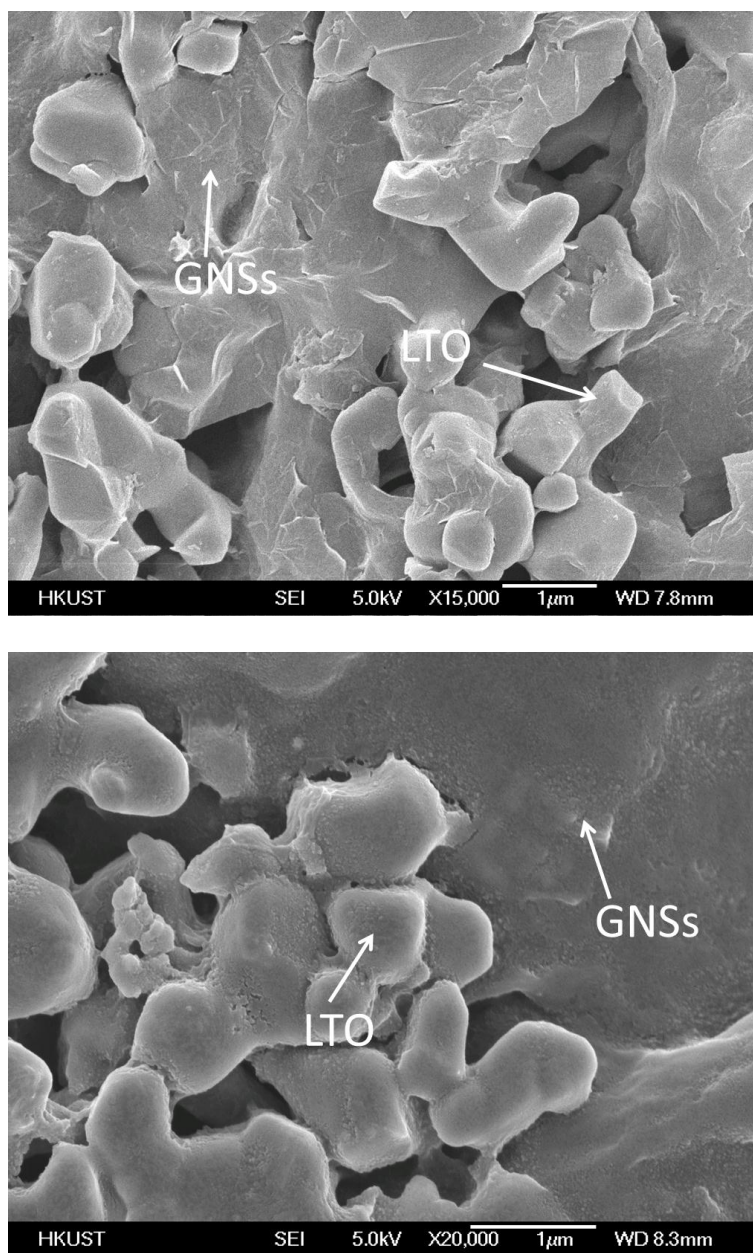

Fig. S3 High magnification SEM images showing LTO/5wt.% GNS electrode (a) before and (b) after 50 cycles.
